# Supplementary material
Source: publisher site journal article supplement (http://www.spandidos-publications.com/4641/downloadSupplementary)

Figure S1. Transfection with FUT7 siRNA. The protein expression levels of FUT7 in Ishikawa cells were detected by western blotting. \*\* $P < 0.01$ . FUT, fucosyltransferase; NC, negative control; siRNA, small interfering RNA.

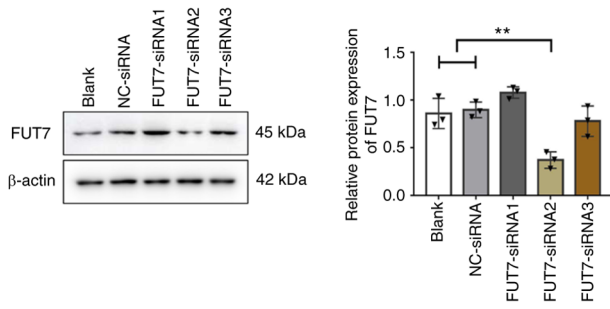

Supplement: Supplementary file 1 [file downloadSupplementary]
